# Supplementary material
Source: PubMed Central journal article supplement (PMC6660981)
Supplement: NIHMS1018751-supplement-Supp_info.pdf [file NIHMS1018751-supplement-Supp_info.pdf]

## Supporting Tables and Figures

### ***Supplementary Figure S1: Muscles from SELENON patients contain fewer fast glycolytic fibers than muscles from healthy controls.***

**A.** Electrophoretic separation of MyHC isoforms performed according to Talmadge and Roy (1985). Proteins were stained with CBB and the migration of the MyHC isoform bands of proteins in isolated soleus and EDL muscles was used as reference. **B.** Relative composition of MyHC I, IIa and IIx in muscles from controls, foetus and *SELENON* patients.

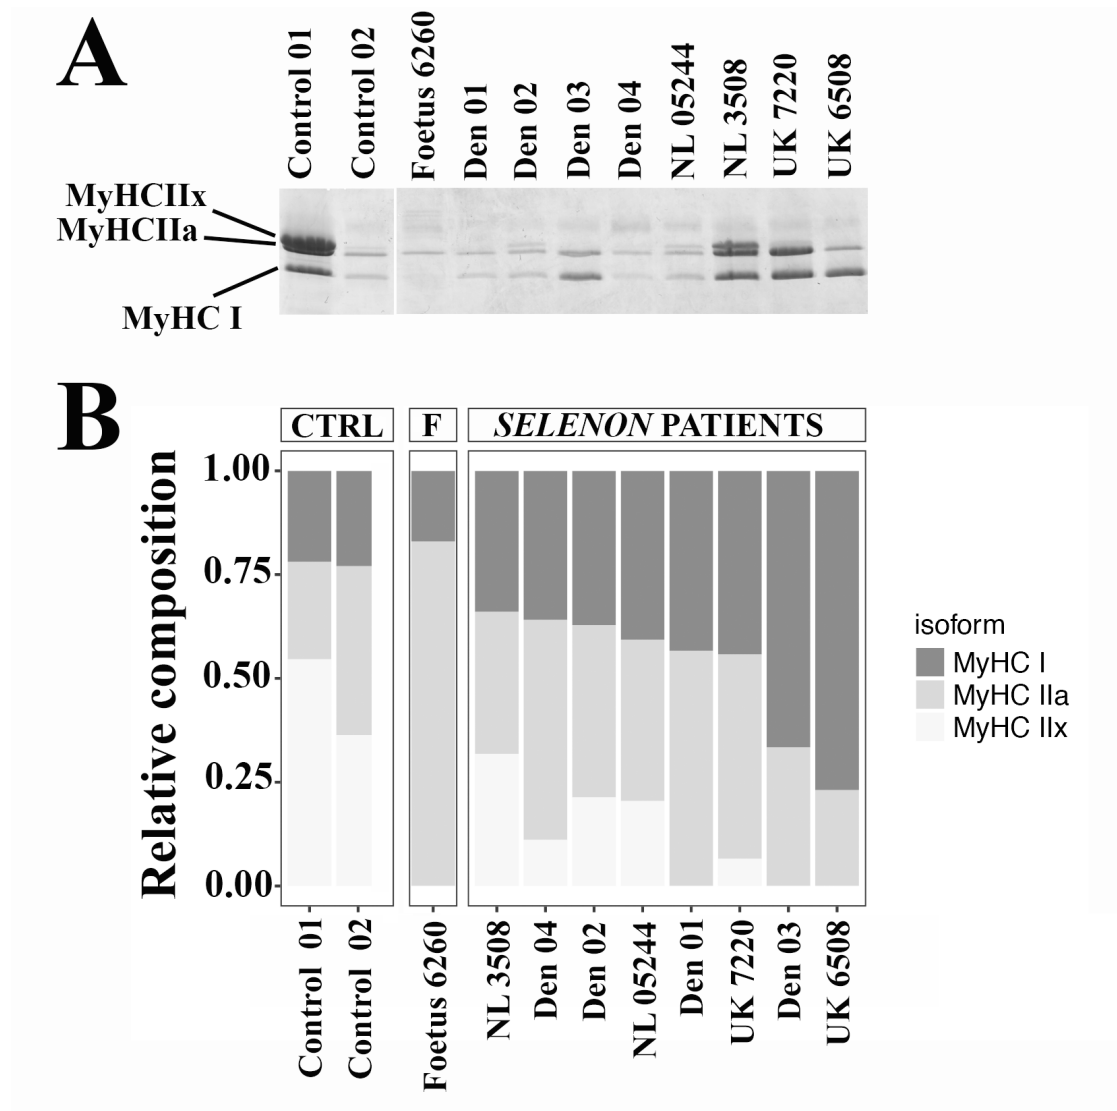

***Supplementary Table S1: List of primary antibodies and suppliers***

|    | <b>Target</b>       | <b>Supplier</b> | <b>Catalogue #</b> |
|----|---------------------|-----------------|--------------------|
| 1  | RyR1                | Thermo Fischer  | MA3-925            |
| 2  | Cav 1.1             | Santa Cruz      | sc-8160            |
| 3  | SERCA1              | LS Bio          | LS-C351853         |
| 4  | SERCA2              | Thermo Fischer  | MA3-910            |
| 5  | Desmin              | Santa Cruz      | sc-14026           |
| 6  | MyHC (all isoforms) | Millipore       | 05-716             |
| 7  | HDAC-4              | Cell Signaling  | 2072S              |
| 8  | HDAC-5              | Abcam           | ab1439             |
| 9  | H3K9ac              | Abcam           | ab10812            |
| 10 | H3K9me3             | Abcam           | ab8898             |
| 11 | Acetylated Lysine   | Abcam           | ab21623            |
| 12 | CasQ-1              | Sigma           | C0743              |
| 13 | CalR                | Abcam           | ab92516            |

**Supplementary Table S2: Sequences of primers used for qPCR**

| Gene                 | Forward                      | Reverse                      |
|----------------------|------------------------------|------------------------------|
| <i>SEPNI/SELENON</i> | 5'-CTGGGGACAGATGGCCTTTTT-3'  | 5'-AATGGGTTTGAACCTCCTCAGG-3' |
| <i>RYR1</i>          | 5'-GGACCTCTACGCCCTGTATC-3'   | 5'-ATCTCCCGCCTTAGCCATTTT-3'  |
| <i>CACNAIS</i>       | 5'-TTGCCTACGGCTTCTTATTCCA-3' | 5'-GTTCCAGAATCACGGTGAAGAC-3' |
| <i>STAC3</i>         | 5'-AATGGTGGCGGGGAAAATC-3'    | 5'-CCCGCTTCGTCTCCTTTCTG-3'   |
| <i>ATP2A1</i>        | 5'-GGTGCTGGCTGACGACAACT-3'   | 5'-AAGAGCCAGCCACTGATGAG-3'   |
| <i>ATP2A2</i>        | 5'-CTCCATCTGCCTGTCCAT-3'     | 5'-GGCTGACGGCTTCCAAGT-3'     |
| <i>ATP2B2</i>        | 5'-CTGCTGTGGGTGTGAACTCT-3'   | 5'-CCGTCCTGTTGTTGGCTTT-3'    |
| <i>HDAC1</i>         | 5'-TCAAGCCGGTCATGTCCAAA-3'   | 5'-CCTCCCAGCATCAGCATAGG-3'   |
| <i>HDAC3</i>         | 5'-TAATGCCTTCAACGTAGGCGA-3'  | 5'-AGCCAGAGGCCTCAAACCTTCT-3' |
| <i>HDAC4</i>         | 5'-AGGCTCAGACTTGCGAGAAC-3'   | 5'-ATCTGGTCTCTTTTCGGCGG-3'   |
| <i>HDAC5</i>         | 5'-GGCAGAAGCTAGACAGCAAG-3'   | 5'-TCCATTCTTGAGCTCTCCTG-3'   |
| <i>HDAC9</i>         | 5'-CTCTCCACCCCTTAGTGGAAC-3'  | 5'-TTGGGCTCAGAGGCAGTTTT-3'   |
| <i>DNMT1</i>         | 5'-AGAACGGTGCTCATGCTTACA-3'  | 5'-CTCTACGGGCTTCACTTCTTG-3'  |
| <i>TRDMT1</i>        | 5'-TGCCAAGACGATTGAAGGCAT-3'  | 5'-GCAGGGAGGGCTCATTAATAAT-3' |
| <i>DES</i>           | 5'-AACCAGGAGTTTCTGACCACG-3'  | 5'-TTGAGCCGGTTCCTTCGG-3'     |

qPCR conditions were as follows: 2 minutes at 50°C, 2 minutes at 95°C, 40 x (15 seconds at 95°C, 1 minute at 60°C) using PowerUp Sybr Green master mix.

***Supplementary Table S3: miRNA specifications and primer sequences used for miRNA quantification***

| <b>miRNA</b> | <b>Human miRBase ID</b> | <b>Sequence</b>                                                            |
|--------------|-------------------------|----------------------------------------------------------------------------|
| 1            | hsa-miR-1-3p            | 5'-UGGAAUGUAAAGAAGUAUGUAU-3'                                               |
| 22           | hsa-miR-22-3p           | 5'-AAGCUGCCAGUUGAAGAACUGU-3'                                               |
| 23           | hsa-miR-23b-3p          | 5'-AUCACAUUGCCAGGGAUUACC-3'                                                |
| 124          | hsa-miR-124a-3p         | 5'-UAAGGCACGCGGUGAAUGCC-3'                                                 |
| 128          | hsa-miR-128a-3p         | 5'-UCACAGUGAACCGGUCUCUUU-3'                                                |
| 133          | hsa-miR-133a-3p         | 5'-UUUGGUCCCCUUCAACCAGCUG-3'                                               |
| 193          | hsa-miR-193b-3p         | 5'-AACUGGCCCUCAAAGUCCCGCU-3'                                               |
| 206          | hsa-miR-206             | 5'-UGGAAUGUAAGGAAGUGUGUGG-3'                                               |
| 224          | hsa-miR-224-3p          | 5'-AAA AUGGUGCCCUAGUGACUACA-3'                                             |
| 486          | hsa-miR-486-3p          | 5'-CGGGGCAGCUCAGUACAGGAU-3'                                                |
| RNU44        | housekeeping gene       | 5'-CCTGGATGATGATAGCAAATGCTGAC<br>TGAACATGAAGGTCTTAATTAGCTCTAA<br>CTGACT-3' |

Amplification was performed using an Applied Biosystems 7500 Fast Real-time PCR System running 7500 software version 2.3 (program: 1 second at 50°C, 10 minutes at 95°C, 40 x (15 seconds at 95°C, 1 minute at 60°C)). Quantification was based on the comparative  $\Delta\Delta C_t$  method.

**Supplementary Table S4: Normalized protein content in muscle samples from *SELENON* patients and controls as determined by densitometric staining of immunopositive bands obtained on western blots.**

| HDAC    | Calcium Homeostasis |        |        |        | Histone Modifications |                        |                   | id           |
|---------|---------------------|--------|--------|--------|-----------------------|------------------------|-------------------|--------------|
| HDAC-4  | RyR1                | Cav1.1 | SERCA1 | SERCA2 | H3K9ac                | H3K9me3                | acetylated Lysine |              |
| 0.6869  | 1.5470              | -      | -      | -      | 1.000                 | -                      | 1.2640            | ctrl01       |
| 1.4427  | 0.2577              | -      | -      | -      | -                     | -                      | -                 | ctrl02       |
| 0.8703  | 1.1953              | -      | -      | -      | -                     | -                      | -                 | ctrl03       |
| 1.000   | 1.000               | 1.0904 | 0.8841 | 0.9709 | 1.1402                | 1.000                  | 1.0911            | ctrl04       |
| -       | -                   | -      | -      | -      | -                     | -                      | 0.7360            | ctrl05       |
| 0.5848  | -                   | -      | 0.9239 | 1.0900 | -                     | 0.7635                 | -                 | ctrl06       |
| 1.1893  | 1.7986              | 1.3304 | 1.0591 | 0.8050 | 1.7596                | 0.8925                 | -                 | ctrl07       |
| 0.5041  | 1.5387              | 1.3776 | 1.0170 | 1.1050 | 0.2404                | 1.4272                 | -                 | ctrl08       |
| 1.0039  | 0.7534              | -      | -      | -      | -                     | 0.7723                 | -                 | ctrl09       |
| 1.4187  | 0.4187              | 0.7311 | -      | -      | -                     | 1.0828                 | -                 | ctrl10       |
| 1.2992  | 0.4907              | 0.5609 | -      | -      | -                     | 1.0617                 | -                 | ctrl11       |
| -       | -                   | 0.3779 | -      | -      | -                     | 1.3826                 | -                 | ctrl12       |
| -       | -                   | 1.5316 | 1.1159 | 1.0291 | 0.8598                | 0.6174                 | 0.9089            | ctrl13       |
| 7.4887  | 0.0001              | 0.0001 | 0.4835 | 0.3087 | 0.0001                | -                      | 0.0318            | Den 01       |
| 5.6065  | 0.1311              | 0.4298 | 0.3668 | 0.9575 | 0.0001                | 0.3580                 | 0.0421            | Den 02       |
| 8.3053  | 0.0263              | 0.3142 | 0.6549 | 1.0906 | 0.4984                | 0.5321                 | 0.0541            | Den 03       |
| 5.5923  | 0.0095              | 0.5179 | 0.7332 | 0.8508 | 0.2862                | 16.8241                | 0.0419            | Den 04       |
| 6.4781  | -                   | -      | 0.5375 | 1.1626 | 0.0670                | -                      | -                 | NL 00682     |
| -       | -                   | 0.5722 | 0.5386 | 1.1213 | 0.6907                | 1.1326                 | 0.1452            | NL 05244     |
| 11.2958 | 0.0001              | -      | 0.2906 | 0.5287 | -                     | 0.8047                 | -                 | NL 3508      |
| -       | -                   | -      | 0.5215 | 0.8472 | -                     | -                      | -                 | UK 3866      |
| -       | -                   | 0.1541 | 0.6202 | 0.7010 | 0.3044                | 0.0960                 | -                 | UK 7220      |
| -       | -                   | -      | -      | -      | 0.2133                | -                      | -                 | UK 6508      |
| 7.0543  | -                   | -      | -      | -      | -                     | -                      | 0.1189            | CH 01        |
| 7.403   | 0.033               | 0.331  | 0.527  | 0.841  | 0.257                 | 3.291                  | 0.072             | patient avg. |
| 0.000   | 0.500               | 1.000  | 5.000  | 10.000 | 100.000               | color code / scale bar |                   |              |

***Supplementary Table S5: Genotypes of the patients whose genome was analyzed for methylation using EPIC Bead Chip Array***

| <b>Sample ID</b>                                            | <b>Mutated gene</b>                        | <b>Variant</b>                                                                              | <b>Age of biopsy (years)</b> |
|-------------------------------------------------------------|--------------------------------------------|---------------------------------------------------------------------------------------------|------------------------------|
| Den 01 (S1)<br>(Ferreiro et al., 2002; Hansen et al., 2011) | <i>SELENON</i><br>( <i>NM_020451.2</i> )   | c.446dup<br>c.943G>A, p.G315S                                                               | 14                           |
| Den 02 (S2)<br>(Witting et al., 2017)                       | <i>SELENON</i><br>( <i>NM_020451.2</i> )   | c.893T>C, p.L298P<br>c.1396C>T, p.R466W                                                     | 7                            |
| Den 03 (S3)<br>(Ferreiro et al., 2002)                      | <i>SELENON</i><br>( <i>NM_020451.2</i> )   | Hom c.943G>A, p.G315S                                                                       | 10                           |
| Den 04 (S4)<br>(Ferreiro et al. 2002)                       | <i>S SELENON</i><br>( <i>NM_020451.2</i> ) | c.943G>A, p.G315S<br>c.713dup                                                               | 14                           |
| NL 05244 (S5)<br>(Ferreiro et al., 2002)                    | <i>SELENON</i><br>( <i>NM_020451.2</i> )   | Hom c.943G>A p.G315S                                                                        | 2                            |
| R1<br>(MmD patient NL03) (Rokach et al., 2015)              | <i>RYRI</i><br>( <i>NM_00540.2</i> )       | c.4711A>G, p.I1571V<br>c.10097G>A, p.R3366H<br>c.11798A>G, p.Y3933C<br>c.14545G>A, p.V4849I | 28                           |
| R2<br>(MmD patient SA07)( Rokach et al., 2015)              | <i>RYRI</i><br>( <i>NM_00540.2</i> )       | Compound<br>Heterozygous<br>c.3381+1 G>A + c.10348-6C>G+<br>c.14524G>A, p.V4842M            | 8 years                      |
| R7<br>(MmD patient NL01) ( Rokach et al., 2015)             | <i>RYRI</i><br>( <i>NM_00540.2</i> )       | Heterozygous <i>RYRI</i> c.11905C>A<br>p.Q3969K                                             | 2 years                      |

## REFERENCES

Ferreiro, A., Quijano-Roy, S., Pichereau, C., Moghadaszadeh, B., Goemans, N., Bönnemann, C., Jungbluth, H., Straub, V., Villanova, M., Leroy, J. P., Romero, N. B., Martin, J. J., Muntoni, F., Voit, T., Estournet, B., Richard, P., Fardeau, M. & Guicheney, P. (2002). Mutations of the selenoprotein N gene, which is implicated in rigid spine muscular dystrophy, cause the classical phenotype of multiminicore disease: reassessing the nosology of early-onset myopathies.. *American Journal of Human Genetics* 71, 739-749.

Hansen, L. K., Schrøder, H. & Ousager, L. (2011). Selenoprotein-related muscular dystrophy. *Ugeskrift for Laeger*, 173(48):3116-3117.

Rokach, O., Sekulic-Jablanovic, M., Voermans, N., Wilmhurst, J., Pillay, K., Heytens, L., Zhou, H., Muntoni, F., Gautel, M., Nevo, Y., Mitrani-Rosenbaum, S., Attali, R., Finotti, A., Gambari, R., Mosca, B., Jungbluth, H. & Treves, S. (2015). Epigenetic changes as a common trigger of muscle weakness in congenital myopathies. *Human Molecular Genetics*, 15, 4636-4647. doi: 10.1093/hmg/ddv195.

Witting, N., Werlauff, U., Duno, M. & Vissing, J. (2017). Phnotypes, genotypes, and prevelance of congenital myopathies older than 5 years in Denmark. *Neurology Genetics*, 3(2) e140. doi: 10.1212/NXG.0000000000000140.
